1 **Examining the governance arrangements for healthcare worker COVID-19 protection in**  
2 **Kenya: A Scoping Review**

3

4 **Jacob Kazungu<sup>1\*</sup>, Nancy N Kagwanja<sup>2,§</sup>, Huihui Wang<sup>3</sup>, Jane Chuma<sup>4</sup>, Kenneth Munge<sup>4</sup>**

5 <sup>1</sup> Health Economics Research Unit, Kenya Medical Research Institute-Wellcome Trust, P.O  
6 Box 43640-0010, Nairobi, Kenya

7 <sup>2</sup> Health Systems and Research Ethics Department, Kenya Medical Research Institute-  
8 Wellcome Trust Research Programme, PO Box 43640, Nairobi 00100, Kenya

9 <sup>3</sup> The World Bank, Washington DC

10 <sup>4</sup> The World Bank, Kenya Country Office, Nairobi, Kenya

11 **\* Corresponding Author**

12 **§ Joint First Author**

13

14

**NOTE: This preprint reports new research that has not been certified by peer review and should not be used to guide clinical practice.**

15 **Abstract**

16 Healthcare workers (HCWs) face a high risk of infection during pandemics or public health  
17 emergencies as demonstrated in the ongoing COVID-19 pandemic. Understanding how  
18 governments respond can inform public health control measures and support health  
19 system functioning. An economic impact analysis examining HCW COVID-19 infections in  
20 Kenya and three other countries estimated that the total economic costs related to HCW  
21 COVID-19 infections costs and deaths in Kenya were US\$113.2 million (range US\$35.8-  
22 US\$246.1). We examined the governance arrangements for HCW protection during the  
23 COVID-19 pandemic in Kenya between March 2020 and March 2021.

24 Governance arrangements were examined following a scoping review of 44 policy and  
25 legislative documents and reports of HCW protection and 22 media articles. We adopted  
26 the transparency, accountability, participation, integrity and capacity (TAPIC) governance  
27 framework to analyse and summarize our findings into policy gaps and implementation  
28 challenges.

29 Policy design gaps included inadequate provisions for emerging threats, inconsistencies  
30 with the devolved context and inadequate structures to monitor, inform and respond to  
31 HCW COVID-19 infections. Implementation challenges were attributed to inadequate  
32 quantity and quality of PPE, difficulty in accessing medical care for HCWs, delays in HCW  
33 remuneration, insufficient infection prevention and control measures, the top-down  
34 application of plans, difficulties in working in a decentralized context, and pre-existing  
35 public finance management (PFM) bottlenecks.

36 Implementation of HCW protection during the COVID-19 pandemic and beyond could  
37 leverage the revamping of current legislation on labour relations to reflect devolved  
38 governance and develop a broader and long-term approach to occupational health and  
39 safety implementation that considers all HCWs. Improvements in PFM arrangements  
40 coupled with increased investment in the health sector and attention to efficient use of  
41 resources will also impact positively on HCW protection.

42

43

44

45

46 **Keywords**

47 COVID-19, Healthcare worker protection, TAPIC framework, Governance, Kenya

48

49

50

51

52 **INTRODUCTION**

53 Healthcare workers (HCWs) are a key component of preparedness and response to public  
54 health emergencies including pandemics. The COVID-19 pandemic has highlighted that  
55 HCWs are, among other things, at high risk of exposure to infection, and other impacts of  
56 pandemics, due to their role in front-line service delivery. For instance, existing evidence  
57 indicated that HCWs were over 11 times more likely to test positive for COVID-19 compared  
58 to the general population (1). In low- and middle-income countries (LMICs) such as Kenya,  
59 pre-existing HCW challenges such as low staffing ratios (2), maldistribution, and general  
60 resource constraints can exacerbate these impacts (3).

61

62 As of November 30, 2021, a total of 7, 848 COVID-19 infections and 53 deaths among HCWs  
63 were reported in Kenya (4) (Figure 1). Every HCW death and infection due to COVID-19 is  
64 not only regrettable but also concerning given the economic impact related to treatment,  
65 transmission to others, absence from work by the affected HCWs, and compromised  
66 quality of care during the COVID-19 pandemic. An economic impact analysis examining  
67 HCW COVID-19 infections in Kenya and three other countries reported elsewhere  
68 estimated that the total economic costs related to HCW COVID-19 infections costs and  
69 deaths were US\$113.2 million (range US\$35.8-US\$246.1) (5). The costs of infections of HCW,  
70 secondary infections to others and indirect costs due to maternal and child deaths were  
71 4.6%, 13.2% and 82.2% respectively. The total cost was equivalent to 2% of total health  
72 expenditure.

73

74

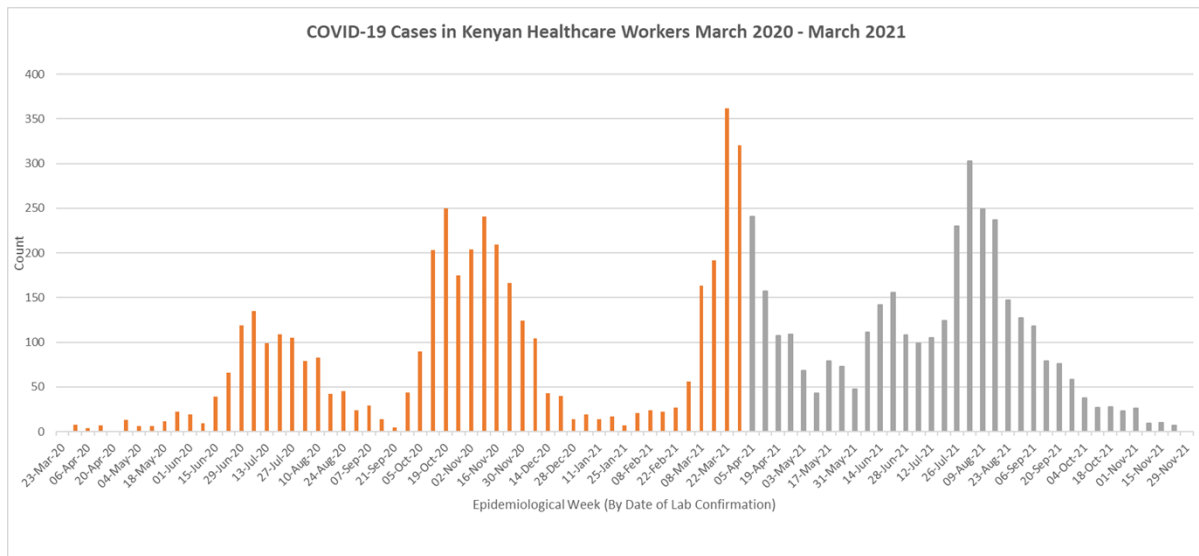

75

76

77

78 Figure 1: COVID-19 infection trends among HCWs as of November 30, 2021; Source: World  
 79 Bank from MoH Kenya (2021), COVID-19 Outbreak in Kenya Daily Situational Report. *Orange*  
 80 *bars indicate the study period*

81

82 This paper explores governance arrangements for HCW protection and implementation of  
 83 COVID-19 HCW protections between March 2020 and March 2021. Specifically, we  
 84 examined existing policy and legislative framework and implementation of HCW  
 85 protection during the COVID-19 pandemic from a governance perspective. Brinkerhoff and  
 86 Bossert (2008) describe governance as the rules determining the distribution and  
 87 performance of roles and responsibilities among government, health service providers  
 88 and beneficiaries (6). In this study, we draw on the transparency, accountability,  
 89 participation, integrity and capacity (TAPIC) framework (Table 1) to examine how  
 90 governance worked to achieve healthcare worker protections during the COVID-19  
 91 pandemic in Kenya (7). Specifically, we highlight the policy design gaps and  
 92 implementation challenges identified across the TAPIC framework components.

93 Table 1: The components of the TAPIC framework (7).

| Component    | Details                                                                                                                     |
|--------------|-----------------------------------------------------------------------------------------------------------------------------|
| Transparency | Decisions, their grounds and their decision-makers are made clear. Access to public information for citizens is made clear. |

|                |                                                                                                                                                                                                            |
|----------------|------------------------------------------------------------------------------------------------------------------------------------------------------------------------------------------------------------|
| Accountability | Process of holding individuals, agencies, and organisations (public, private, and civil society) responsible for executing their powers.                                                                   |
| Participation  | Engagement of affected parties/interests in decision-making                                                                                                                                                |
| Integrity      | Good public management such as meritocratic hiring, clear performance, standards, and clear organizational missions                                                                                        |
| Capacity       | A mix of technical skills and networks, across governments and among experts and civil society. Also refers to the ability to formulate evidence-based and politically sensible recommendations for health |

94

95 Key terms used in this paper are summarised in Box 1:

- **Employer:** Any public body including national and county governments, and their agencies, or private organisation which has entered a contract of service to employ healthcare workers.
- **Healthcare worker (HCW):** Everyone working in the healthcare sector and involved in the delivery of healthcare in any capacity, which includes but is not limited to doctors, nurses, laboratory staff, nutritionists, hospital cleaners, ambulance drivers, and administrative staff who support health service delivery.
- **Healthcare worker protection:** All the measures to promote the safety, welfare, and well-being of healthcare workers, and includes the ordinary basic or minimum wage or pay and emoluments payable, directly, or indirectly whether cash or in kind, by an employer to an employee arising out of the employment of that employee, medical benefits, provision of personal protective equipment (PPE) and a safe working environment. These protections are those that should be in place including during the COVID-19 pandemic and are drawn from Kenyan legislation and the guidelines on COVID-19 by WHO and ILO.

96 Box 1: Summary of key terms

97

## 98 METHODS

99 We conducted a scoping review of the governance arrangements and implementation of  
100 HCW protections for the COVID-19 response in Kenya. The documents related to proposed  
101 plans, reports and implementation of HCW protection were restricted to the period  
102 between March 2020 and March 2021 given the first officially reported case of COVID-19 in  
103 Kenya was recorded on March 13, 2020. However, we referred to documents published  
104 before March 2020 to examine existing governance arrangements for HCW protection  
105 before COVID-19.

## 106 Scoping Review

107 To describe and analyse the Kenyan governance context for the protection of healthcare  
108 workers during the COVID-19 pandemic, we conducted a scoping review guided by the  
109 following questions:

- 110 1. What are the laws, policies and mechanisms that govern the protection of health  
111 workers in Kenya?
- 112 2. What are the roles and responsibilities of different levels of government and other  
113 institutions/stakeholders?
- 114 3. What are the decision-making, funding, oversight, monitoring and evaluation  
115 processes in place for HCW protection?
- 116 4. How and what provisions were made to enhance the protection of health workers  
117 during the COVID-19 pandemic?
- 118 5. To what extent did these provisions meet the needs of health workers during the  
119 COVID-19 pandemic, viewed through the lens of the TAPIC framework?

## 120 **Search strategy**

121 We conducted purposive searches for articles and documents relevant to healthcare  
122 worker protection in two iterative phases (Table 2 summarises the search terms applied):

- 123 i) A search of the websites of various institutions to identify legislation, policy and  
124 guidelines on healthcare worker protection. These institutions included the  
125 Ministry of Health (MoH), Ministry of Labour and Social Protection (MoLSP),  
126 county government websites, World Health Organization (WHO), research  
127 institutions (e.g., Kenya Medical Research Institute (KEMRI)), civil society  
128 groups (e.g., the Kenya Legal and Ethical Issues Network (KELIN)), and HCW  
129 unions and associations. The same websites were searched for reports of  
130 incidents related to COVID-19 exposure among HCWs (for example infection  
131 rates, deaths, stigma) and practices of HCW protection during the COVID-19  
132 pandemic.
- 133 ii) A search of media articles reporting on proposed and implemented HCW  
134 protection measures and on issues influencing the implementation of HCW  
135 protections during the COVID-19 pandemic period. This search was conducted  
136 on Google and the following search terms were applied.

137

138

139

140

141 Table 2: Search terms applied

| <b>Term</b><br><b>Outbreak</b><br>Variants combined by OR                 | <b>Protection</b><br>Variants combined by OR                                           | <b>Health care worker</b><br>Variants combined by OR                                |
|---------------------------------------------------------------------------|----------------------------------------------------------------------------------------|-------------------------------------------------------------------------------------|
| COVID-19, coronavirus, SARS-CoV-2 pandemic, emergency, outbreak, epidemic | Protection, Intervention*, Infection, stress, burn-out, support, safety, mental health | Health provider, nurse* doctor*, clinician*, healthcare staff, healthcare provider* |

142

143 **Inclusion criteria**

144 The following inclusion criteria were applied to the documents and articles.

- 145 1. Kenyan legislation and policy documents related to healthcare worker protection.
- 146 2. Reports, guidelines, and journal articles related to healthcare worker protection  
147 during the COVID-19 pandemic response were published/released between March  
148 2020 (when COVID-19 was declared a global health threat and Kenya reported her  
149 first case) and March 2021.
- 150 3. Media articles were included in the review if they were published between March  
151 2020 and March 2021.

152 Overall, 44 policy documents (legislation, public sector and health sector policy, COVID-19  
153 related guidelines and reports) and 22 media articles were included in this review.

154

155 **RESULTS**

156 **Governance of HCW Protections**

157 **Role of national and county governments in HCWs protections**

158 HCW protection in Kenya is enshrined in the Constitution, specific legislation, regulations  
159 and guidance (Table 3).

160

161 Table 3: Provision for HCW protection drawn from legislation and policies.

| <b>Legislation</b> | <b>Provision for HCW protection</b> |
|--------------------|-------------------------------------|
|--------------------|-------------------------------------|

|                                                        |                                                                                                                                                                                                                                                                                                                                                                                                                                                                                                                                                                                                                                                                                                                                                                                              |
|--------------------------------------------------------|----------------------------------------------------------------------------------------------------------------------------------------------------------------------------------------------------------------------------------------------------------------------------------------------------------------------------------------------------------------------------------------------------------------------------------------------------------------------------------------------------------------------------------------------------------------------------------------------------------------------------------------------------------------------------------------------------------------------------------------------------------------------------------------------|
| The Constitution, 2010                                 | Article 41: ‘Every person has the right to fair labour practices. These include the right to; fair remuneration, reasonable working conditions, join and participating in trade union activities (except the Police and Defence Forces) which includes participating in a lawful strike (Article 41) (8).                                                                                                                                                                                                                                                                                                                                                                                                                                                                                    |
| Employment Act, 2007                                   | Requires employers (both public and private sectors), to provide medical treatment for employees including transport to and from the hospital at the employer’s cost unless provided free by the Government (Section 46((1); Protects employees against dismissal for participating in trade union activities including strikes (46) (d)(i) (9).                                                                                                                                                                                                                                                                                                                                                                                                                                             |
| Work Injury Benefits Act, 2007                         | Requires public and private sector employers to obtain and maintain an insurance policy, to cover any liability that the employer may incur under this Act to any of his employees; (Section 38 (1)<br>Confers an employee with entitlements to compensation if the employee contracts a disease that arose out of and during the employee’s employment (Section 38(b)                                                                                                                                                                                                                                                                                                                                                                                                                       |
| Occupational Safety and Health Act, 2007               | Requires:<br>-Occupiers to ensure the safety, health, and welfare at work of all persons working in their workplace. (Section 6)<br>-Employer to maintain a register of all occupational diseases/injuries (Section 21 (2)<br>-Employer to provide protective personal equipment at the workplace<br>-Medical surveillance which includes planned periodic examination of employees, through clinical examination or medical tests of employees at the start, during and at the exit of employment (Section 2).                                                                                                                                                                                                                                                                              |
| County Public Service and Human Resource Manual, 2013. | -Identifies the county government as an employer with the responsibility to provide medical cover to an employee and his family (pg. 48)<br>-Establishes a consultative committee consisting of up to three members from the County Government and three members from employees’ unions. The main functions of the Committee are to provide a platform for negotiation and secure the greatest cooperation between employers and employees (pg. 60)<br>-Chief Officer has a responsibility to ensure a safe working environment, provision of PPE to those working in hazardous working environments, medical examination of those working in hazardous environments (pg. 63)<br>-Provision to make claims for workplace injuries and diseases acquired in the course of employment (pg. 64) |
| Public Service and Human Resources Manual, 2016.       | -Has provision for medical benefits for government employees and their dependents including medical ex-gratia assistance, where an employee exceeds in-patient medical cover (pg. 58-59)<br>-Requires all state departments and their agencies to have a health and safety committee (pg. 96)                                                                                                                                                                                                                                                                                                                                                                                                                                                                                                |



|                                                      |                                                                                                                                                                                                                                                                                                                                                                                                         |
|------------------------------------------------------|---------------------------------------------------------------------------------------------------------------------------------------------------------------------------------------------------------------------------------------------------------------------------------------------------------------------------------------------------------------------------------------------------------|
|                                                      | <ul style="list-style-type: none"> <li>-Requires employees to be provided with personal protective equipment (pg. 98);</li> <li>-Highlights compensation for occupational disease, injury or death arising out of the course of employment (pg. 98)</li> <li>-Identifies the National Treasury as the source of funds for compensation for work injuries and occupational diseases. (pp 101)</li> </ul> |
| Healthcare Waste Management Strategic Plan 2015-2020 | <ul style="list-style-type: none"> <li>-Establishes technical teams to guide Healthcare waste management to national and county governments (pg. 34)</li> <li>-Identifies facility level (Infection Prevention and Control (IPC) committees as the structures that guide Healthcare waste management (pg. 20)</li> </ul>                                                                                |

162 Document reviews suggested that both the Public Service and Human Resource Policies  
 163 and Procedures Manual (10) and the County Public Service and Human Resource Manual  
 164 (11) are in use for the management of public sector healthcare workers at the national and  
 165 county level respectively (12, 13). However, the county-level guidance did not address key  
 166 Occupational Safety and Health (OSH) structures and processes such as OSH Committees  
 167 at workplaces; funding sources, or funds and processes for accessing employee medical  
 168 benefits even though these are included in the national level guidance (11, 14).

170 In practice, governance arrangements for HCW protection are shared by the national and  
 171 county governments (Figure 2). Our review also highlighted an important role for non-  
 172 state actors including labour unions, civil society organizations, and the media.  
 173

174

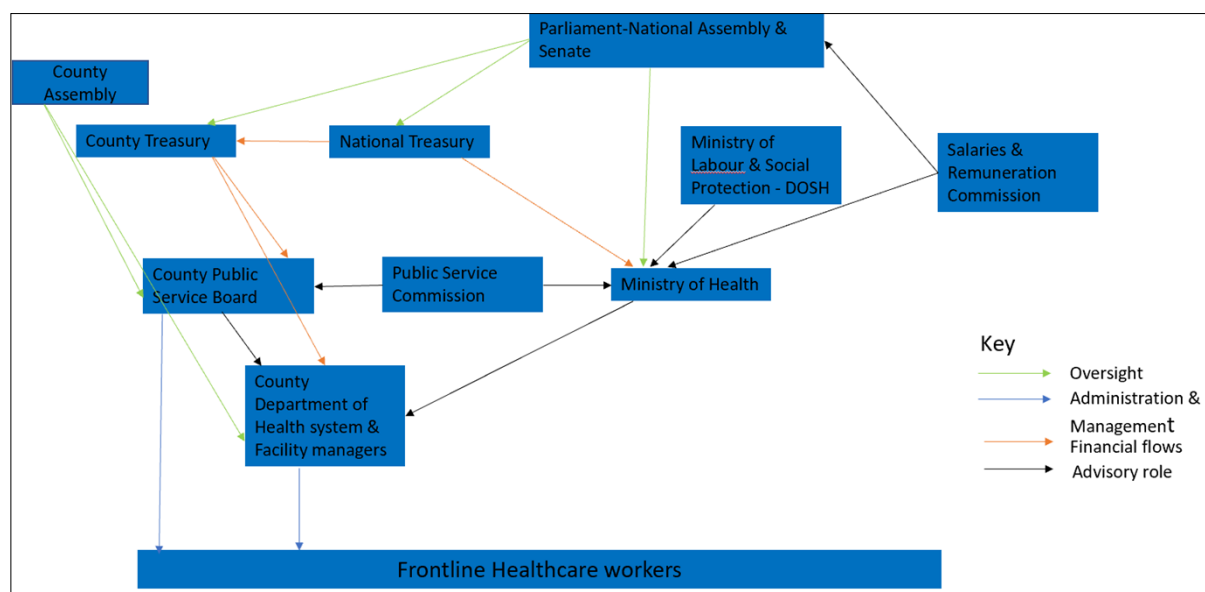

175 Figure 2: Governance architecture for HRH protection Source: World Bank  
 176

177

178 At the national level, the Public Service Commission (PSC) has delegated the role of Human  
179 Resources for Health (HRH) management to the MoH's Directorate of Human Resources  
180 (15). The Directorate is responsible for the development of HRH policies and capacity  
181 building of counties for HRH management. MoH's semi-autonomous agencies such as  
182 national referral hospitals have human resource management units within their  
183 organizational structures.

184

185 At the county level, HRH management is a joint responsibility of the County Public Services  
186 Board (CPSB) and the County Department of Health (CDoH). The CPSB has overall  
187 oversight and management of all the county public service employees (11). The county  
188 executive committee (CEC) member for health heads the CDOH and is responsible for the  
189 management and coordination of the county administration and its departments including  
190 the development and implementation of county policies. Every department including the  
191 County Department of Health (CDoH) has a Chief Officer who reports upwards to the CEC  
192 and Governor and is responsible for efficient management, administration and utilization  
193 of resources and public funds. The Chief Officer works closely with the County Director of  
194 Health and the County Health Management Team (CHMT) which comprises technical  
195 managers who provide support supervision and management for the sub-county levels  
196 and the Sub-County Health Management Team (SCHMT). Some counties have an HRH unit  
197 in keeping with MoH recommendations (16) whose function is to provide input on salary  
198 and benefits administration, be responsible for county-level HRH record management,  
199 disseminate HR policies and guidelines for the health sector, manage disputes between  
200 healthcare workers and county governments and ensure that healthcare workers have a  
201 safe, clean, healthy working environment (17). The unit is headed by an HRH manager who  
202 reports to the Chief Officer of Health.

203 Private sector HCW protections are provided through national legislation and regulation,  
204 and internal HR policies of the respective private sector entity. Additional oversight is  
205 through the Ministry of Labour and Social Protections' (MoLSP) Directorate of  
206 Occupational Safety and Health Services (DOSHS). MoH guidance on staff qualifications

207 and requirements for the performance of certain services or procedures also influence  
208 HWC protections in the private sector.

209 **Government measures enacted towards HCW protections**

210 The government adopted several measures to ensure healthcare worker protection during  
211 the COVID-19 pandemic. We classified these using the lens of the TAPIC framework and  
212 identified their influence on HCW protection (Table 4).

213

214 Table 4: Summary of analysis of government interventions related to HCW protections

| Measure by GoK                                                                                                                                                                                                                                                                                                                                                                                                                                                                                                                                                                                                         | TAPIC Governance Domain(s)                           | Influence on HCW protections                                                                                                                      |                                                                                                                                                                                                                                                                                 |
|------------------------------------------------------------------------------------------------------------------------------------------------------------------------------------------------------------------------------------------------------------------------------------------------------------------------------------------------------------------------------------------------------------------------------------------------------------------------------------------------------------------------------------------------------------------------------------------------------------------------|------------------------------------------------------|---------------------------------------------------------------------------------------------------------------------------------------------------|---------------------------------------------------------------------------------------------------------------------------------------------------------------------------------------------------------------------------------------------------------------------------------|
|                                                                                                                                                                                                                                                                                                                                                                                                                                                                                                                                                                                                                        |                                                      | Positive influence                                                                                                                                | Negative Influence                                                                                                                                                                                                                                                              |
| Publication of the Kenya COVID-19 Contingency Plan & Executive Order No 2 of 2020: The contingency plan contained costed measures for HCW protections (e.g. training of HCWs, PPE procurement) (18) and established the National Emergency Response Committee (NERC) whose roles included co-ordination of the COVID-19 response (19).                                                                                                                                                                                                                                                                                 | Capacity                                             | The potential positive influence of training was eroded by the inaccessibility of PPE in the early phases of the response (20).                   | Remuneration concerns including delays in regular salaries negatively influenced HCW worker protections and resulted in industrial action in several counties which increased the risk of absenteeism (20).                                                                     |
| Publication of various MoH Kenya COVID-19 guidelines with provisions for: <ul style="list-style-type: none"> <li>• HCWs’ right to remove themselves from dangerous work situations, for example, working with inadequate PPE (21)</li> <li>• Employers’ responsibilities to provide, information and training on OSH and adequate IPC and PPE (22, 23); a blame-free environment for reporting incidents (22, 23); compensation during quarantine (23); separate isolation for COVID-19 infected HCWs(23); psychosocial support, insurance and support for female HCWs to focus on service delivery(21, 24)</li> </ul> | Capacity                                             | The guidelines had a positive influence on HCW protections by providing a framework for use by public and private sector employers and employees. | In practice, the value of the guidelines was undermined by operational bottlenecks such as inconsistency in the availability of PPE and failure to provide medical benefits to infected staff (25-28)                                                                           |
| Centralised procurement and distribution of PPE by the national government:                                                                                                                                                                                                                                                                                                                                                                                                                                                                                                                                            | Transparency<br>Accountability<br>Integrity Capacity | The procured PPE should have provided additional protection for HCWs                                                                              | There were gaps in the availability and quality of PPE provided linked to emergency procurement arrangements of PPE by the Kenya Medical Supplies Agency (KEMSA) confirmed by an audit of KEMSA ordered by the Senate (29) and the National Assembly Health Committee (20, 30). |

| Measure by GoK                                                                                                                                                                                                                                                                                                                                                                              | TAPIC Governance Domain(s)                              | Influence on HCW protections                                                                                                                                           |                                                                                                                                                                                                                                                                                                                                                                                                                                              |
|---------------------------------------------------------------------------------------------------------------------------------------------------------------------------------------------------------------------------------------------------------------------------------------------------------------------------------------------------------------------------------------------|---------------------------------------------------------|------------------------------------------------------------------------------------------------------------------------------------------------------------------------|----------------------------------------------------------------------------------------------------------------------------------------------------------------------------------------------------------------------------------------------------------------------------------------------------------------------------------------------------------------------------------------------------------------------------------------------|
|                                                                                                                                                                                                                                                                                                                                                                                             |                                                         | Positive influence                                                                                                                                                     | Negative Influence                                                                                                                                                                                                                                                                                                                                                                                                                           |
| Recruitment and distribution to county governments of additional HCWs<br>Kshs 1 billion was allocated for the recruitment of HCWs by the national government (31).                                                                                                                                                                                                                          | Capacity                                                | The recruitment of an additional 6,203 HCWs likely positively influenced HCW protections by providing much-needed support for severely stretched staff (31).           |                                                                                                                                                                                                                                                                                                                                                                                                                                              |
| Resource mobilization and allocation for county-level activities. The National Assembly approved Kshs 23.4 billion (Kshs 16.7 billion from government revenue, Kshs 6.7 billion from external partners) in funding for the COVID-19 response(20). The government also received donations of Personal Protective Equipment (PPE) from private companies and international organisations (20) | Capacity<br>Accountability<br>Integrity                 | Increased availability of financial resources and resources in kind positively influenced HCW protections. Donated PPE was critical to improving HCW protections (32). | Despite early resource mobilisation, long-standing financial flow constraints between the national and county level (33, 34), delays in the revision of county budgets and establishment of emergency funds (34) hampered the capacity and integrity of the COVID-19 response at the county level. This resulted in delayed training for frontline HCWs, salary delays for contracted HCWs, and inequitable distribution of allowances (30). |
| Availability of daily situation reports the COVID-19 contingency plan (18) and periodic media updates on the COVID-19 pandemic.                                                                                                                                                                                                                                                             | Capacity<br>Transparency<br>Accountability<br>Integrity |                                                                                                                                                                        | Official MoH information on HCW infections remained publicly unavailable until January 2021 despite media reports of HCW COVID-19-related deaths (35), making it difficult to hold actors accountable for implementing HCW protections and likely negatively impacting HCW protections.                                                                                                                                                      |

| Measure by GoK                                                                                                                                                                                                                       | TAPIC Governance Domain(s)                   | Influence on HCW protections                                                                                                                                                                                                                                                     |                                                                                                                                                                                                                                                                                                     |
|--------------------------------------------------------------------------------------------------------------------------------------------------------------------------------------------------------------------------------------|----------------------------------------------|----------------------------------------------------------------------------------------------------------------------------------------------------------------------------------------------------------------------------------------------------------------------------------|-----------------------------------------------------------------------------------------------------------------------------------------------------------------------------------------------------------------------------------------------------------------------------------------------------|
|                                                                                                                                                                                                                                      |                                              | Positive influence                                                                                                                                                                                                                                                               | Negative Influence                                                                                                                                                                                                                                                                                  |
| Oversight by parliamentary committees: The Senate and National Assembly) utilised existing and ad hoc mechanisms to provide oversight of the implementation of the COVID-19 response (20, 30).                                       | Accountability<br>Integrity<br>Participation | Improving participation and ensuring accountability e.g., through the invitation of MoH, HCW associations and trade unions to hearings by the Ad Hoc Senate Committee on COVID-19 (30) and National Assembly Departmental Health Committee (20) likely enhanced HCW protections. | Weaknesses in enforcing and monitoring accountability, particularly at the county level may have undermined HCW protection (36, 37).                                                                                                                                                                |
| Leveraging existing health facility IPC committees: In several public hospitals, existing IPC committees and coordinators were incorporated in addressing IPC issues as part of the COVID-19 response(38).                           | Capacity<br>Integrity<br>Participation       | Increased resources for IPC activities positively influenced capacity and HCW participation by improving the functionality of IPC committees.                                                                                                                                    | Several issues remained inadequately addressed e.g. PPE supply, long-standing infrastructural issues (e.g. frequent breakages and leaks of taps and pipes affecting water supply), and waste management challenges (38).                                                                            |
| Leveraging OSH structures at the county and facility level. The organisational structure for ensuring HCWs' protections included the County OSH focal person, HRH manager and Chief Officer in the CDoH, and the CPSB, (11, 15, 39). | Accountability<br>Integrity<br>Capacity      | Improved OSH capacity and accountability with the formation of OSH focal persons at the county level (11, 15, 39).                                                                                                                                                               | Significant gaps in the definition of and access to medical benefits resulting from COVID-19 infection coupled with salary delays worsened HCW protections by hampering prevention measures (e.g., PPE availability and workplace changes) and limiting access to healthcare services (35, 40, 41). |
| Establishment of a call centre to provide psychosocial support for frontline HCWs, by the Ministry of ICT with the support of the private sector (42, 43).                                                                           | Capacity<br>Transparency                     | The call centre would have had a positive influence on HCW's well-being but there is little information available on its functioning.                                                                                                                                            | -                                                                                                                                                                                                                                                                                                   |

215 Key: CDoH-County Department of Health; CPSB-County Public Service Board; CSO-Civil Society Organisations; HCWs-Health Care Workers,  
216 HR-Human Resource; KMPDU-Kenya Medical Practitioners and Dentists Union; ICT-Information, Communication and Technology; IPC-  
217 Infection Prevention and Control, MoH-Ministry of Health, NHIF-National Hospital Insurance Fund, OSH-Occupational Safety and Health

## 218 **Experiences of HCWs in the private sector**

219 An analysis of the reviewed documents provided little information on the experiences of  
220 HCWs in the private sector. Few private facilities, mainly large private hospitals within  
221 urban areas, provided COVID-19 care and treatment at the time of analysis (44). The limited  
222 engagement of private facilities in managing COVID-19 patients was linked to inadequate  
223 PPE and supplies, and an expectation that all suspected COVID-19 would be referred to  
224 public health facilities (44). Despite the lack of attention to the experiences of HCWs in the  
225 private sector, data from the KELIN studies suggest that in the early days of the COVID-19  
226 response, there was low preparedness and responsiveness to HCW infections across both  
227 public and private sectors (26-28). These findings are however limited by the fact only 16%  
228 of 601 clinical officers, 17% of 155 nurses and 6% of 85 doctors (medical officers, pharmacists  
229 and dentists) surveyed worked in the private sector.

230

## 231 **Role of non-state actors**

232 As early as April 2020, two healthcare worker unions, Kenya National Union of Nurses  
233 (KNUN) and Kenya Medical Practitioners, Pharmacists and Dentists Union (KMPDU)  
234 highlighted the inadequacy of PPE and lack of isolation centres for HCWs as key gaps in  
235 HCW protections (25). Professional associations such as the Kenya Medical Association  
236 (KMA), Kenya Dentists Association (KDA) and National Nurses Association of Kenya  
237 (NNAK) also issued recommendations for employers to ensure PPE provision, withdraw  
238 vulnerable HCWs from frontline roles, and advised HCWs of their right to decline to attend  
239 to suspected or confirmed COVID-19 cases if PPE was inadequate (45-47).

240

241 Civil society groups also played a prominent role in supporting the effective governance of  
242 HCW protections. Studies conducted in April 2020 by KELIN working with NNAK, KUCO  
243 and KMPDU demonstrated low levels of preparedness and response to HCW protections  
244 across various domains in both public and private sectors (26-28). The studies found that  
245 between 81-93% of HCWs lacked work injuries benefit cover; 72-82% had re-used PPE and  
246 82-95% wanted psychosocial support.

247

248 The media also raised transparency and accountability questions through reports on the  
249 disappearance of donated PPE and other commodities (32), and poor reporting and under-



250 utilisation of COVID-19 funds at the county level (48, 49). Increasing HCW agitation  
251 triggered by increasing COVID-19 infections and related deaths and perceived  
252 unresponsiveness of public employers escalated to county-level HCW strikes (50) and later  
253 to nationwide HCW strikes in December 2020 (35, 40, 41, 51, 52).

254

255

## 256 **DISCUSSION**

257 This paper presents evidence of the governance arrangements for HCW protection in  
258 Kenya covering the first three waves of the COVID-19 pandemic in Kenya. Our review of  
259 governance capacities using the TAPIC framework found gaps in the design and  
260 implementation of measures to ensure HCW protection during the COVID-19 pandemic.  
261 These gaps likely contributed to the reported COVID-19 infection rates among HCWs that  
262 could have been avoidable.

263

264 Our analysis of the governance arrangements of HCW protections highlighted significant  
265 design gaps. Legislation concerned with employee protections did not align with  
266 decentralization arrangements, the evolution of workplaces away from industries, or the  
267 reality of emerging infectious diseases and public health emergencies (53-55). More recent  
268 policy documents, such as the MOH guidelines for OSH and National OSH policy have tried  
269 to catch up with decentralisation by including county governments as complementary  
270 actors in the delivery of HCW protection (39, 56). However, the translation of this policy  
271 to practice is constrained by insufficient monitoring and few active county OSH officers  
272 (57). Further, exposure to COVID-19 was identified as an occupational hazard for HCWs  
273 (58), a positive step in enhancing transparency and accountability during the COVID-19  
274 pandemic, and in OSH practice for HCWs more broadly.

275 We also identified challenges in the implementation of HCW protections. We identified (i)  
276 fragmentation of responsibilities for OSH across multiple departments and levels of  
277 government (59, 60); (ii) inadequate operationalization of key provisions such as a  
278 medical scheme for employees; and (iii) insufficient surveillance and monitoring of OSH  
279 hazards and injuries among HCWs. Challenges with reporting of HCW OSH have been

280 reported in other settings and there has been a call to countries to not only track HCW  
281 infections, deaths and other related occupational hazards, but also to make such  
282 information publicly accessible (61, 62).

283 The broader challenge of HCW information management has implications for  
284 preparedness and response. Poor information management hampered response in Kenya  
285 and other settings with challenges in confirming access to PPE (63). Better management  
286 of information would support the real-time implementation of response measures such as  
287 increasing access to PPE, supporting effective resource reallocation, and supporting the  
288 rapid investigation of measures such as vaccination as demonstrated in the current  
289 pandemic (64).

290 Several pre-pandemic contextual factors may also have contributed to the observed  
291 shortcomings in HCW protections. Kenya scored poorly on the coordination of public  
292 health emergency preparedness and response in the Joint Inspection Report on  
293 International Health Regulations Conducted in 2015 (65). Coordination challenges  
294 between national and county-level health system actors (66, 67) may also have  
295 exacerbated the usual difficulties of top-down implementation approaches such as poor  
296 information flow and incentive misalignment (68, 69). Chronic underinvestment (70) and  
297 inefficiencies (71) in the health sector also meant that the system was less well-prepared  
298 to respond to increased demands for HCW protection. This is despite recent assessments  
299 showing the value of an investment in HCW protection through measures such as PPE (63).  
300 The establishment of the National Public Health Institute to coordinate public health  
301 emergency preparedness and response should go some way in bridging this gap (63).

## 302 **Study limitations and Strengths**

303 Our findings should be interpreted in light of the following limitations. First, the scoping  
304 review was limited by a scarcity of documents that adopted a broad definition of HCWs.  
305 The majority of the reviewed study documents focused on three cadres (nurses, clinical  
306 officers, and doctors) with little attention to other cadres and non-clinical staff. Second,  
307 few documents reported on HCW experiences in the private sector even though the  
308 private sector accounts for approximately 50% of health service provision in Kenya (72)  
309 (and therefore employs a significant proportion of HCWs). Third, interviews with key

310 informants could have complemented the findings from the study. Despite these  
311 limitations, the article has several strengths. First, it explored legislation and policy  
312 guidelines and considered proposed policy with findings from government reports and  
313 media accounts. This broad-based review enriches the body of knowledge on HCW  
314 protection status and needs. Second, the application of a TAPIC framework allowed for an  
315 objective discussion of policy and practice and has enabled reflection on the extent to  
316 which HCW protections proposed and implemented during the early days of the COVID-19  
317 pandemic met HCW's needs.

## 318 **CONCLUSIONS**

319 The study revealed how implementation factors such as capacity, transparency, and  
320 accountability gaps interacted with policy design gaps to undermine HCW protection.  
321 Existing laws and policies promoting HCW protections are a strength that Kenya can build  
322 on for greater responsiveness to HCWs' protections even beyond the COVID-19 pandemic.  
323 Consequently, it is paramount to (i) update relevant labour relations and OSH legislation  
324 and policies to reflect devolved governance and identify infectious diseases as workplace  
325 hazards for HCWs; (ii) enhance the functionality of operational structures for HCW  
326 occupational safety and health during emergencies specifically through legal and  
327 administrative provisions for national-level coordination and implementation; (iii)  
328 strengthen information management around HCW safety and health including a broader  
329 definition of HCWs and a broader view of health including mental health; (iv) develop a  
330 plan to institutionalize financial and health system responsiveness during public health  
331 emergencies e.g., to account for fast-tracked procurement procedures or funds flows; and  
332 (v) develop a costed plan for the preparedness and response measures for HCW  
333 protection during public health emergencies e.g., to account for access to PPE and  
334 emerging measures such as COVID-19 vaccination.

335

336

337

## 338 **Funding**

339 Funding for the analysis came from the World Bank Kenya. The funders had no role in the  
340 study design, analysis, interpretation of the data, the decision to publish, or preparation  
341 of the manuscript

342

343 **Competing interests**

344 The authors declare that they have no competing interests.

345

346 **Ethics**

347 Not applicable. The study utilised secondary sources of data.

348

349

350

351

352

353

354

355 **REFERENCES**

356 1. Nguyen LH, Drew DA, Graham MS, Joshi AD, Guo C-G, Ma W, et al. Risk of COVID-19 among  
357 front-line health-care workers and the general community: a prospective cohort study. *The Lancet*  
358 *Public Health*. 2020;5(9):e475-e83.

359 2. WHO. The 2018 Update: World Health Geneva: World Health Organisation; 2018.

360 3. Chersich MF, Gray G, Fairlie L, Eichbaum Q, Mayhew S, Allwood B, et al. COVID-19 in Africa:  
361 care and protection for healthcare workers. *Globalisation and Health*. 2020;16(46).

362 4. MoH. COVID-19 Daily Situation Report, April 17, 2021. Nairobi: Ministry of Health; 2021.

363 5. Huihui Wang WZ, Kenneth Munge Kabubei, Jennifer Rasanathan, Jacob Kazungu,, Sandile  
364 Ginindza SM, Luis Ernesto Salinas, Amanda McClelland, Marine, Buissonniere CL, Jane Chuma, Jeremy  
365 Veillard, Thulani Matsebula, Mickey Chopra. The economic burden of COVID-19 infections amongst  
366 health care workers in the first year of the pandemic in Kenya, Colombia, Eswatini, and South Africa.  
367 2023.

368 6. Brinkerhoff DW, Bossert TJ. Health governance: concepts, experience, and programming  
369 options. Bethesda: Health Systems. 2008;20:20.

370 7. Greer SL, Wismar M, Kosinska M, Organization WH. Towards intersectoral governance:  
371 lessons learned from health system governance. *Public Health Panorama*. 2015;1(02):128-32.

372 8. Kenya LO. The constitution of Kenya: 2010: Chief Registrar of the Judiciary; 2013.

373 9. GoK. The Employment Act, 2007. 2007.

374 10. PSC. Human Resource Policies and Procedures Manual for the Public Service. Nairobi Kenya:  
375 Public Service Commission; 2016.

376 11. PSC. County Public Service Human Resource Manual Nairobi: Public Service Commission of  
377 Kenya; 2013 [

378 12. MoH. Kenya's Human Resources for Health Commitments at the 2013 Third Global HRH Forum  
379 in Brazil. Nairobi: Ministry of Health; 2013.

380 13. Muriuki J, Thuku M, Ndolo M, Muraguri N, Njoroge D, Mulwa A, et al. Kenya Makes Progress  
381 Towards HRH Commitments in a Devolved System. Washington DC: Intrahealth Institution and  
382 Ministry of Health, Kenya; 2015.

383 14. PSC. Human Resources Policies and Procedure Manual for the Public Service. Nairobi, Kenya:  
384 Public Service Commission; 2016 1 May 2016.

385 15. MoH. Devolved HRM Policy Guidelines on Human Resources for Health Nairobi, Kenya:  
386 Ministry of Health; 2015 [updated February.

387 16. MoH. Devolved Human Resource Management Guidelines on Human Resources for Health.  
388 Nairobi: Ministry of Health; 2015.

389 17. Thuku MK, Muriuki J, Ummuro A, Oyucho L, Nelson D. Coordinating health workforce  
390 management in a devolved context: lessons from Kenya. *Human Resources for Health*. 2020;18.

- 391 18. MoH. National 2019 Novel Coronavirus Contingency (Readiness and Early Response) Plan  
392 Nairobi, Kenya: Ministry of Health; 2020 [updated January.
- 393 19. GoK. Executive Order No 2 of 2020. Nairobi: Government of Kenya; 2020.
- 394 20. Parliament. Report on the Inquiry into Utilisation of COVID-19 funds by MoH, Nairobi:  
395 Parliament, The National Assembly; 2020 [updated October 1st. Departmental Committee on Health  
396 ].
- 397 21. WHO. Health workforce policy and management in the context of the COVID-19 pandemic  
398 response Geneva: World Health Organisation; 2020 [updated December 3rd.
- 399 22. WHO. World Health Organization interim guidance, Coronavirus disease (COVID-19) outbreak:  
400 rights, roles and responsibilities of health workers, including key considerations for occupational  
401 safety and health Geneva: World Health Organisation; 2020 [updated March 18th.
- 402 23. MoH. HRH protocol for the COVID-19 response Nairobi: Ministry of Health; 2020 [updated  
403 April 30.
- 404 24. MoH. COVID-19: Occupational health and safety for health workers Geneva: World Health  
405 Organisation; 2021 [updated February 2.
- 406 25. Wasike A. Nurses risking lives in COVID-19 battle, Local unions decry lack of protective  
407 equipment, safety measures for health workers Nairobi: AA news; 2020 [updated April 8th.
- 408 26. KELIN K. Monitoring Report on the Level of Preparedness of Healthcare Workers (Clinical  
409 Officers) To COVID-19,. Nairobi: KELIN; 2020.
- 410 27. KELIN K. Monitoring Report on the Level of Preparedness of Healthcare Workers (KMPDU  
411 members) To COVID-19,. Nairobi: KELIN; 2020.
- 412 28. KELIN N. Monitoring Report on the Level of Preparedness of Healthcare Workers (Nurses) To  
413 COVID-19. Nairobi: KELIN; 2020.
- 414 29. TI. Tracking COVID-19: A report on Transparency and Accountability in Government's  
415 Response to the COVID-19 pandemic. Nairobi: Transparency International; 2020.
- 416 30. Parliament. Third Progress Report of the Senate Ad Hoc Committee on COVID-19. Nairobi: Ad  
417 Hoc Committee on COVID-19; 2020.
- 418 31. Transparency Internationalx. Tracking COVID-19: A report on Transparency and Accountability  
419 in Government's Response to the COVID-19 pandemic. 2020.
- 420 32. EastAfrican T. Scanty information on Jack Ma's Covid-19 donations to Kenya Nairobi: NMG;  
421 2020 [updated June 20th; cited 2020 June 20]. Available from:  
422 [https://www.theeastafrican.co.ke/tea/news/east-africa/scanty-information-on-jack-ma-s-covid-19-](https://www.theeastafrican.co.ke/tea/news/east-africa/scanty-information-on-jack-ma-s-covid-19-donations-to-kenya-1443560)  
423 [donations-to-kenya-1443560](https://www.theeastafrican.co.ke/tea/news/east-africa/scanty-information-on-jack-ma-s-covid-19-donations-to-kenya-1443560).
- 424 33. Budget Co. County Governments Budget Implementation Review Report For the FY  
425 2019/2020. Nairobi, Kenya: Office of the Controller of Budget; 2020.
- 426 34. Thinkwell G. COVID-19 May 2020 Kenya Update. Nairobi: Think Well Global; 2020.
- 427 35. VoA N. Kenya Buries First Doctor to Succumb to COVID-19 Nairobi: VoA News; 2020 [cited  
428 2020 July 14]. Available from: [https://www.voanews.com/a/covid-19-pandemic-kenya-buries-first-](https://www.voanews.com/a/covid-19-pandemic-kenya-buries-first-doctor-succumb-covid-19/6192728.html)  
429 [doctor-succumb-covid-19/6192728.html](https://www.voanews.com/a/covid-19-pandemic-kenya-buries-first-doctor-succumb-covid-19/6192728.html).
- 430 36. Kijilwa G. Nurses, clinicians left out as doctors sign deal to end strike Nairobi: The Standard;  
431 2020 [updated December 24.
- 432 37. MoH. Remarks by the CS, Ministry of Health on Return to Work Formula with KUCO  
433 Nairobi2021 [updated January 01.
- 434 38. Michuki M, Auguet-Tosas O, English M, Schultz C, McKnight J. Infection prevention and  
435 control during the COVID-19 pandemic: challenges and opportunities for Kenyan public hospitals.  
436 Wellcome Open Research. 2020.
- 437 39. MoH. Occupational Safety and Health Guidelines for the Health Sector. Nairobi: Ministry of  
438 Health; 2014.
- 439 40. Kajilwa G. MP sobs over doctors' plight as committee summons Health CS Nairobi2020  
440 [updated November 19th.

- 441 41. Yusuf M. Kenyans doctors strike over pay and working conditions Nairobi: VoA News; 2020  
442 [updated December 6th
- 443 42. Ben-hur J. Health Care workers to receive psychosocial support Nairobi: The Standard; 2020  
444 [updated June 25th.
- 445 43. MoH. CS ICT launches Covid-19 call centre for health care workers Nairobi: Ministry of Health;  
446 2020 [updated June 25; cited 2020 June 25]. Available from: [https://www.health.go.ke/cs-ict-](https://www.health.go.ke/cs-ict-launches-covid-19-call-centre-for-health-care-workers/)  
447 [launches-covid-19-call-centre-for-health-care-workers/](https://www.health.go.ke/cs-ict-launches-covid-19-call-centre-for-health-care-workers/).
- 448 44. Collaborative H. Private Sector Engagement in the COVID-19 Response: Kenya Country  
449 Experience: World Health Organisation Private Health Sector Engagement for COVID-19 Initiative;  
450 2020 [Available from: <https://hsgovcollab.org/en/node/4511>.
- 451 45. KMA. KMA COVID-19 Response Advisory Committee (CRAC) Meeting Resolution Nairobi2020  
452 [updated April 11. Available from: [https://kma.co.ke/images/2020/CRAC\\_1\\_RESOLUTION\\_-\\_26-8-](https://kma.co.ke/images/2020/CRAC_1_RESOLUTION_-_26-8-20_-_ii.pdf)  
453 [20 - ii.pdf](https://kma.co.ke/images/2020/CRAC_1_RESOLUTION_-_26-8-20_-_ii.pdf).
- 454 46. KDA. COVID-19 Kenya Dentists Association Recommendation Nairobi: Kenya Dental  
455 Association; 2020 [updated March 23; cited 2020 March 23]. Available from:  
456 [https://kma.co.ke/Documents/COVID-](https://kma.co.ke/Documents/COVID-19%20KDA%20Recommendation%2023rd%20March%20(2).pdf)  
457 [19%20KDA%20Recommendation%2023rd%20March%20\(2\).pdf](https://kma.co.ke/Documents/COVID-19%20KDA%20Recommendation%2023rd%20March%20(2).pdf).
- 458 47. Nyarangi E, Abuga E, Omoro J. Plea for pregnant frontline workers as nurse is buried: The  
459 Standard; 2020 [updated August 08.
- 460 48. Otieno J. Irony of Covid-19 billions lying idle in counties Nairobi: The Star; 2020 [updated  
461 August 28.
- 462 49. Oketch A. Medics suffer as PPEs waste away Nairobi: Nation Media Group; 2020 [updated  
463 November 29th.
- 464 50. Obulutsa G, Ratner B. Doctors strike in Nairobi over pay, lack of COVID protection Nairobi:  
465 Reuters; 2020 [updated August 21st.
- 466 51. BBC N. Kenya doctors' fury over COVID-19 deaths Nairobi, Kenya: BBC News; 2020 [updated  
467 November 16th; cited 2020 November 16]. Available from: [https://www.bbc.com/news/world-africa-](https://www.bbc.com/news/world-africa-54960146)  
468 [54960146](https://www.bbc.com/news/world-africa-54960146).
- 469 52. Ben-hur J. Nurses issue two-week strike notice Nairobi: The Standard Health; 2020 [updated  
470 November 24.
- 471 53. ILO. Ebola Virus Disease: Occupational Safety and Health Joint WHO/ILO briefing note for  
472 workers and employees. Geneva, Switzerland: International Labour Organisation; 2014.
- 473 54. ILO. SARS: Practical and administrative responses to an infectious disease. Geneva,  
474 Switzerland: International Labour Organization; 2009.
- 475 55. ILO. ILO Standards and COVID-19 (coronavirus) Geneva: International Labour Organisation;  
476 2020 [updated May 29.
- 477 56. Ministry L. National Occupational Safety and Health Policy. Nairobi: Ministry of Labour; 2012.
- 478 57. ILO. National Profile on Occupational Safety and Health, Kenya. Geneva, Switzerland:  
479 International Labour Organisation; 2013.
- 480 58. MoH. Kenya COVID-19 Emergency Response Project: Labour management procedures.  
481 Nairobi: MoH; 2021.
- 482 59. Ncube F, Kanda A. Current Status and the Future of Occupational Safety and Health Legislation  
483 in Low- and Middle-Income Countries. Safety and Health At Work. 2018;9(4):365-71.
- 484 60. Moyo D, Zungu M, Kgalamono S, Mwila CD. Review of occupational health and safety  
485 organisation in expanding economies. Annals of Global Health. 2015;81(4):495-502.
- 486 61. Amnesty I. Exposed, Silenced and Attacked: Failures to protect Health and Essential Workers  
487 During the COVID-19 Pandemic. London: Amnesty International; 2020.
- 488 62. ICN. More than 600 nurses die from COVID-19 worldwide: International Council of Nurses;  
489 2020 [updated June 3rd. Available from: [https://www.icn.ch/news/more-600-nurses-die-covid-19-](https://www.icn.ch/news/more-600-nurses-die-covid-19-worldwide)  
490 [worldwide](https://www.icn.ch/news/more-600-nurses-die-covid-19-worldwide).

- 491 63. Kazungu J, Munge K, Werner K, Risko N, Vecino-Ortiz AI, Were V. Examining the cost-  
492 effectiveness of personal protective equipment for formal healthcare workers in Kenya during the  
493 COVID-19 pandemic. BMC health services research. 2021;21(1):1-7.
- 494 64. Orangi S, Ojal J, Brand SP, Orlando C, Kairu A, Aziza R, et al. Epidemiological impact and cost-  
495 effectiveness analysis of COVID-19 vaccination in Kenya. medRxiv. 2022.
- 496 65. Talisuna A, Yahaya AA, Rajatonirina SC, Stephen M, Oke A, Mpairwe A, et al. Joint external  
497 evaluation of the International Health Regulation (2005) capacities: current status and lessons learnt  
498 in the WHO African region. BMJ Global Health. 2019;4(6):e001312.
- 499 66. Tsofa B, Molyneux S, Gilson L, Goodman C. How does decentralisation affect health sector  
500 planning and financial management? a case study of early effects of devolution in Kilifi County, Kenya.  
501 International Journal of Equity in Health. 2017;16(151).
- 502 67. Barasa Edwine MA, Molyneux Sasst, Tsofa Benjamin. Recentralization with decentralization:  
503 county hospital autonomy under devolution in Kenya. Plos One. 2017;12(8).
- 504 68. Hudson B, Hunter D, Peckham S. Policy failure and the policy-implementation gap: can policy  
505 support programs help? Policy Design and Practice. 2019;2(1):1-14.
- 506 69. NAO. Over-Optimism in Government Projects. London; 2013.
- 507 70. MoH. Kenya National Health Accounts 2015/2016. Nairobi: MoH; 2019.
- 508 71. Mulaki A, Muchiri S. Kenya Health System Assessment. Washington DC: Palladium; 2019.
- 509 72. Barnes J, O'Hanlon B, Feeley F, McKeon K, Gitonga N, Decker K. Private Health Sector  
510 Assessment in Kenya. World Bank Working Paper No 193. Washington DC: World Bank; 2010.

511
